# Supplementary material for: Rapid Multiplex Real-Time PCR Method for the Detection and Quantification of Selected Cariogenic and Periodontal Bacteria
Source: MDPI journal article supplement (doi:10.3390/diagnostics10010008), 2019-12-22
Supplement: s1 [file s1]

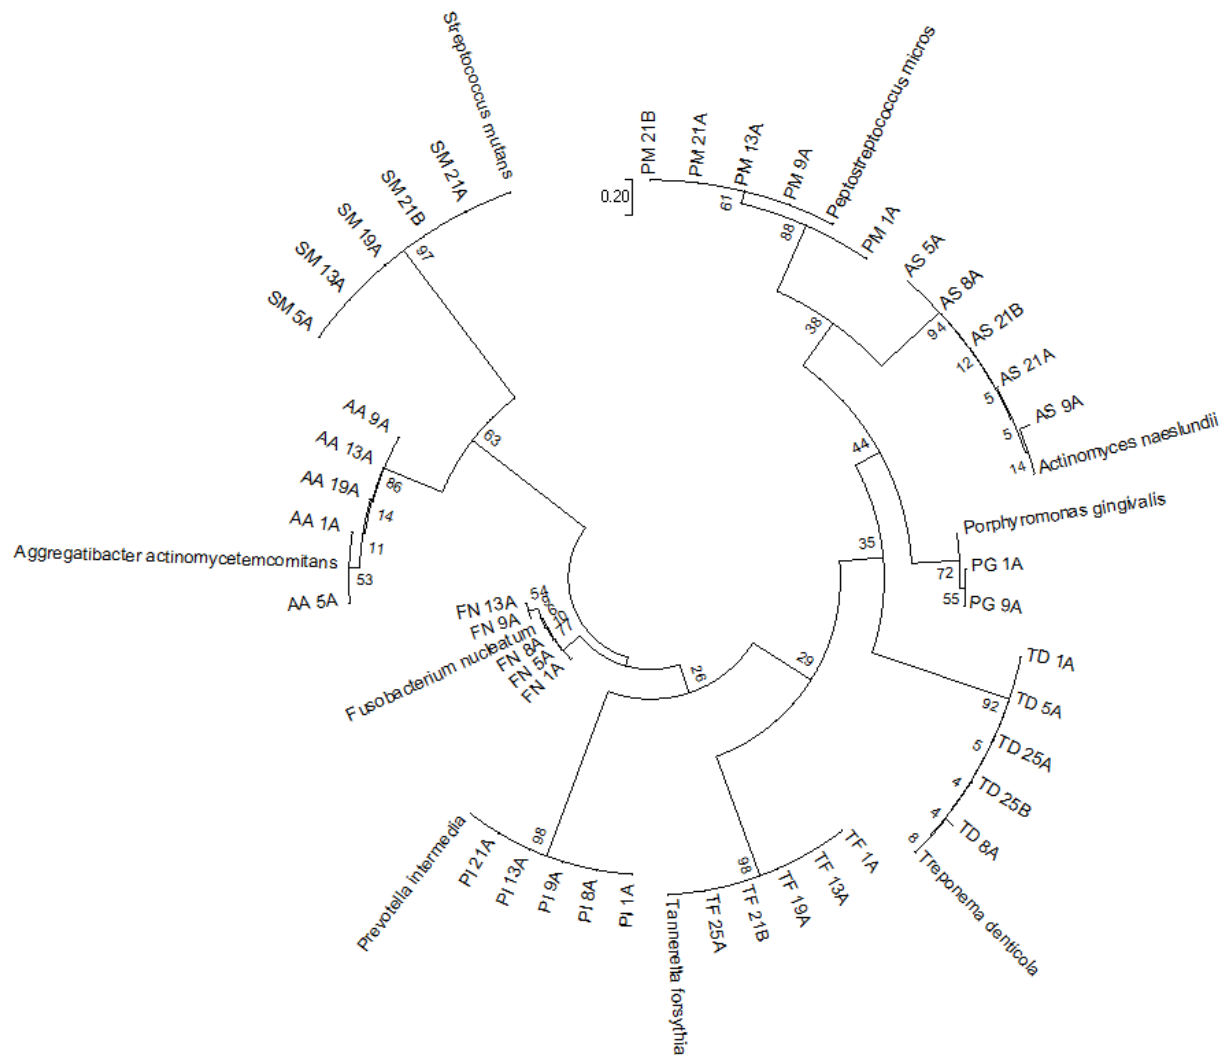

**S1 Fig:** Evolutionary relationships of taxa. The evolutionary history was inferred using the Neighbor-Joining method [1]. The evolutionary distances were computed using the Maximum Composite Likelihood method [2]. All positions containing gaps and missing data were eliminated. Evolutionary analyses were conducted in MEGA7 [3].

## References

1. Saitou N, Nei M (1987) The neighbor-joining method: a new method for reconstructing phylogenetic trees. *Mol Biol Evol* 4:406–425. <https://doi.org/10.1093/oxfordjournals.molbev.a040454>
2. Tamura K, Nei M, Kumar S (2004) Prospects for inferring very large phylogenies by using the neighbor-joining method. *Proc Natl Acad Sci USA* 101:11030–11035. <https://doi.org/10.1073/pnas.0404206101>
3. Kumar S, Stecher G, Tamura K (2016) MEGA7: Molecular Evolutionary Genetics Analysis Version 7.0 for Bigger Datasets. *Mol Biol Evol* 33:1870–1874. <https://doi.org/10.1093/molbev/msw054>
